# Supplementary material for: Dual-wavelength enhanced upconversion luminescence properties of Li+-doped NaYF4:Er,Yb glass-ceramic for all-optical logic operations
Source: Royal Society of Chemistry journal article supplement (doi:10.1039/d3dt00102d), 2023-01-01
Supplement: d3dt00102d1.pdf [file d3dt00102d1.pdf]

## Supplementary Information

### Dual-wavelength enhanced upconversion luminescence properties of Li<sup>+</sup> doped NaYF<sub>4</sub>:Er,Yb glass-ceramic for all-optical logic operations

*Yanxin Zhang<sup>a</sup>, Weitao Ying<sup>a</sup>, Jingyi He<sup>a</sup>, Xuemei Fan<sup>a</sup>, Shiqing Xu<sup>a</sup>, Jianmin Gu<sup>a,b</sup> and Shimin Liu<sup>\*a</sup>*

<sup>a</sup>State Key Laboratory of Metastable Materials Science and Technology (MMST), Yanshan  
University, Qinhuangdao 066004, China

<sup>b</sup>Hebei Key Laboratory of Applied Chemistry, School of Environmental and Chemical Engineering,  
Yanshan University, Qinhuangdao 066004, China

\*To whom correspondence should be addressed. E-mail: [lsm@ysu.edu.cn](mailto:lsm@ysu.edu.cn).

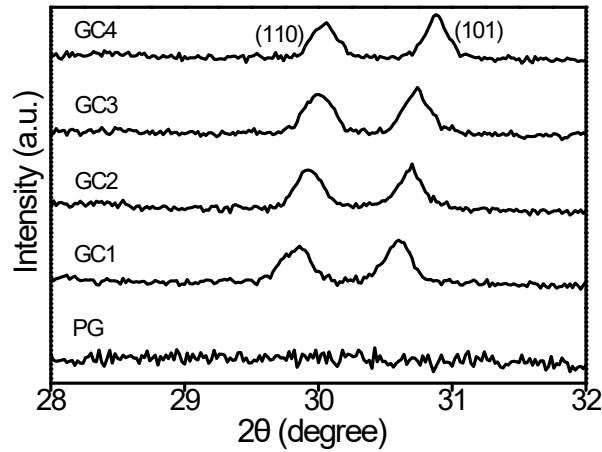

**Fig. S1.** The magnified XRD diffraction peaks assigned to (110) and (101) planes.

Fig. S1 is the magnified XRD diffraction peaks assigned to (110) and (101) planes. With the increase of  $\text{Li}^+$  doping concentration (GC1 to GC4), the peak position gradually shifted towards larger angles. It is well known that the ionic radius of  $\text{Li}^+$  ion is much smaller than that of  $\text{Na}^+$  and  $\text{Y}^{3+}$ , where  $\text{Li}^+$  ions can be easily accommodated in the lattice. According to Bragg's law:  $2d\sin\theta = n\lambda$ , where  $d$  represents the interplanar spacing,  $\theta$  is the Bragg diffraction angle,  $n$  is the diffraction order, and  $\lambda$  indicates the diffraction wavelength of X-ray. When  $n$  and  $\lambda$  are fixed, the  $\theta$  inversely proportional to  $d$ . When doping the  $\text{Li}^+$  ions,  $\text{Na}^+$  ions at the lattice position are preferentially replaced by  $\text{Li}^+$ , as a result, the lattice shrinks and  $d$  decreases, which leads to  $\theta$  offset to a higher angle. In other words, the lattice spacing decreasing indicates that the  $\text{Li}^+$  ion with small radius enters the lattice and replaces the  $\text{Na}^+$  ion with large radius.

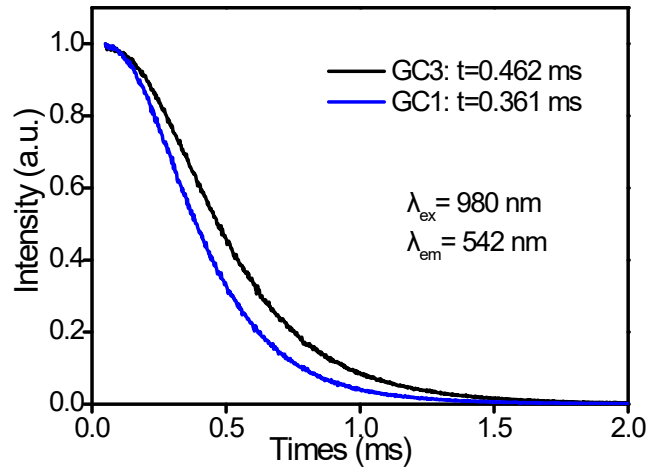

**Fig. S2.** Luminescence decay curves for GC1 and GC3 samples at 542 nm UC emissions under the excitation of 980 nm laser.

The fluorescence decay curves of GC1 and GC3 samples are in good agreement with the single exponential decay indicated by formula  $I(t) = I_0 + A \exp(-t/\tau)$ , where  $t$  is the time,  $I(t)$  and  $I_0$  are the upconversion (UC) intensities at time  $t$  and 0, respectively,  $A$  is a constant,  $t$  is the time, and  $\tau$  is the decay time for the exponential components. And the quite similar fitting equations of both of GC1 and GC3 samples at 542 nm and 656 nm indicate that  $\text{Li}^+$  doping does not make a fundamental change to the UC mechanism of GC samples. Under 980 nm laser excitation, the fluorescence lifetime of GC1 sample at 542 nm emission is 0.361 ms, while GC3 sample is 0.462 ms. The result further shows that  $\text{Li}^+$  ions doping could enhance the UC luminescence intensity of GC samples, which is consistent with UC spectral results.

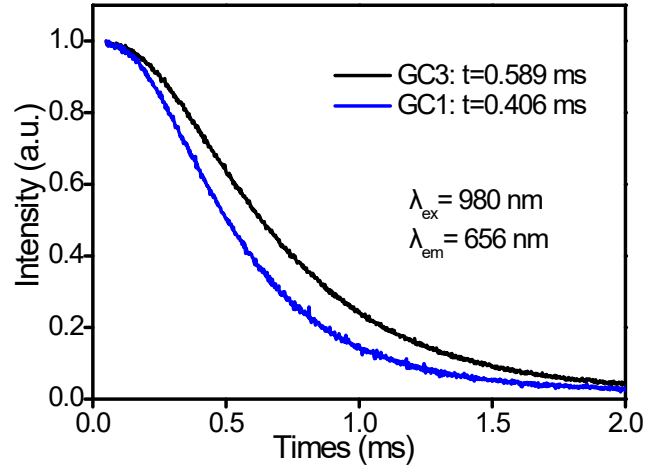

**Fig. S3.** Luminescence decay curves for GC1 and GC3 samples at 656 nm UC emissions under the excitation of 980 nm laser.

The fluorescence decay curves of GC1 and GC3 samples at 656 nm emission are also in good agreement with the single exponential decay indicated by formula  $I(t)=I_0 + Aexp (-t/\tau)$ . The fluorescence lifetime of GC1 sample at 656 nm emission is 0.406 ms, while GC3 sample is 0.589 ms, which also indicates that Li<sup>+</sup> ions doping could enhance the UC luminescence intensity of GC samples.
